# Supplementary material for: Monodispersed NiO Nanoparticles into SBA-15: An Efficient Nanocatalyst to Produce Ketone-Alcohol (KA) Oil by the Oxidation of Cyclohexane in Mild Conditions
Source: MDPI journal article supplement (doi:10.3390/su15075817), 2023-03-27
Supplement: s1 [file s1]

# Supporting Informations

## For:

### **Monodispersed NiO nanoparticles into SBA-15: An efficient nanocatalyst for the oxidation of cyclohexane to produce ketone-alcohol (KA) oil in mild conditions**

Mohamed Abboud<sup>a\*</sup>, Reem S. Al-Nefaie<sup>a</sup>, Asla A. AL-Zahrani<sup>b</sup>, Nabil Al-Zaqri<sup>c</sup>, Mohammad Abu Haija<sup>d</sup>, Azza Al-Ghamdi<sup>b</sup>, Omeer Alqahtani<sup>a</sup>, Mohamed S. Hamdy<sup>a</sup>

<sup>a</sup> Catalysis Research Group (CRG), Department of Chemistry, College of Science, King Khalid University, P.O. Box 9004, Abha 61413, Saudi Arabia.

<sup>b</sup> Department of Chemistry, College of Science, Imam Abdulrahman Bin Faisal University, P.O. Box 1982, Dammam 31441, Saudi Arabia.

<sup>c</sup> Department of Chemistry, College of Science, King Saud University, P.O. Box 2455, Riyadh 11451, Saudi Arabia.

<sup>d</sup> Department of Chemistry, Khalifa University of Science and Technology, Abu Dhabi, United Arab Emirates.

\*Corresponding Author: Email: [Abboud\\_med@yahoo.fr](mailto:Abboud_med@yahoo.fr); [mabboud@kku.edu.sa](mailto:mabboud@kku.edu.sa); Phone: +966 53 48 46 782

# Content

|                                                                                                                                      |   |
|--------------------------------------------------------------------------------------------------------------------------------------|---|
| <b>Figure S1.</b> FT-IR spectra of SBA-15 and N-SBA-15.....                                                                          | 3 |
| <b>Figure S2.</b> FT-IR spectra of four precursors $\text{Ni}_j\text{@N-SBA-15}$ ( $j = \text{Ac, Nt, Cl, or Sl}$ ) .....            | 3 |
| <b>Table S1.</b> FT-IR peaks of SBA-15, N-SBA-15.....                                                                                | 4 |
| <b>Table S2.</b> FTIR data of the catalyst's precursors $[\text{Ni}]_i\text{@N-SBA-15}$ , SBA-15 and N-SBA-15.....                   | 4 |
| <b>Figure S3.</b> TGA (a) and DTA (b) analysis of precursors $[\text{Ni}]_i\text{@N-SBA-15}$ ( $i = \text{Ac, Nt, Cl and Sl}$ )..... | 5 |
| <b>Figure S4.</b> Effect of narrowed pores in the SBA-15 structure on the isotherm shape.....                                        | 6 |
| <b>Figure S5.</b> Particles diameter distribution in $\text{NiO}_{\text{Cl}}\text{@SBA-15}$ .....                                    | 6 |
| <b>Figure S6.</b> Reusability of bulk NiO powder as a catalyst in the oxidation of CXN with <i>m</i> -CPBA.....                      | 7 |

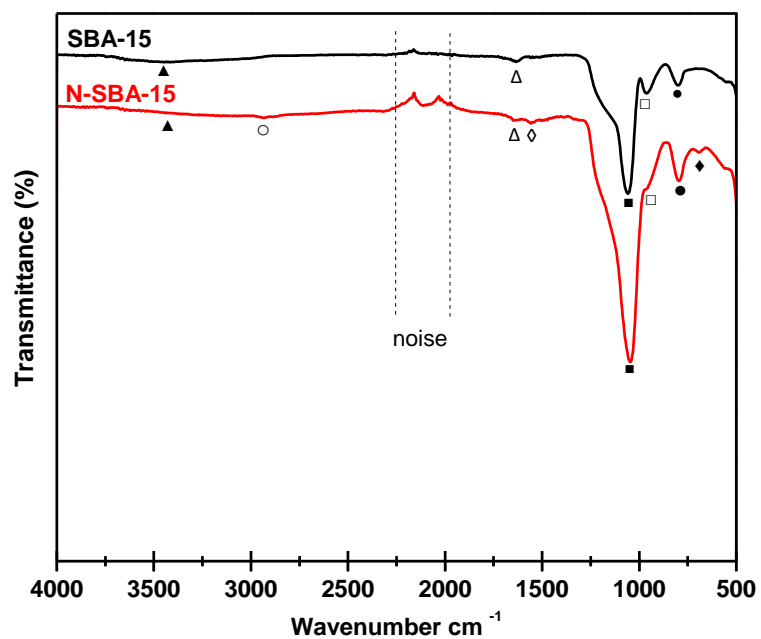

**Figure S1.** FT-IR spectra of SBA-15 and N-SBA-15

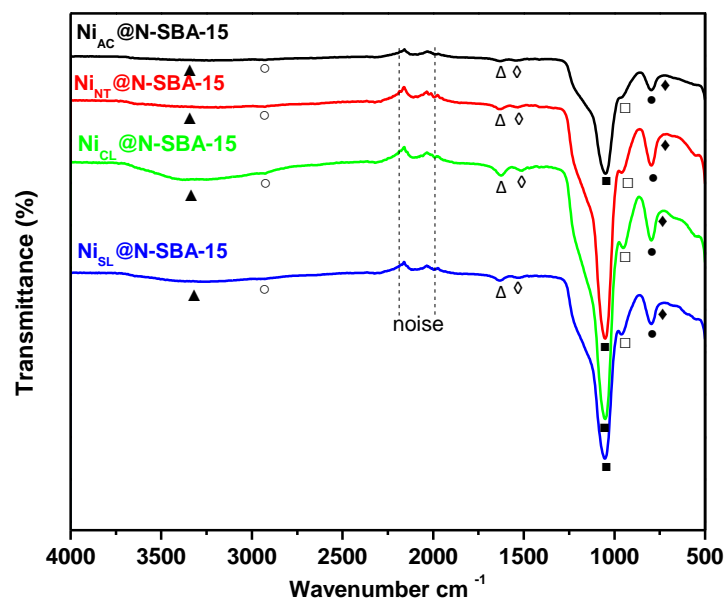

**Figure S2.** FT-IR spectra of four precursors  $\text{Ni}_j\text{@N-SBA-15}$  ( $j = \text{Ac, Nt, Cl, or Sl}$ )

**Table S1.** FT-IR peaks of SBA-15, N-SBA-15

| Samples         | $\nu$ SiO-H str. ( $\blacktriangle$ ) ( $\text{cm}^{-1}$ ) | $\nu$ SiO-H deform. ( $\Delta$ ) ( $\text{cm}^{-1}$ ) | $\nu$ SiO-H bend. ( $\square$ ) ( $\text{cm}^{-1}$ ) | $\nu$ Si-O sym. ( $\bullet$ ) ( $\text{cm}^{-1}$ ) | $\nu$ Si-O asym. ( $\blacksquare$ ) ( $\text{cm}^{-1}$ ) | $\nu$ CH <sub>2</sub> (APTES) ( $\circ$ ) ( $\text{cm}^{-1}$ ) | $\nu$ N-H out-plane bend. ( $\blacklozenge$ ) ( $\text{cm}^{-1}$ ) | $\nu$ N-H in-plane bend. ( $\diamond$ ) ( $\text{cm}^{-1}$ ) |
|-----------------|------------------------------------------------------------|-------------------------------------------------------|------------------------------------------------------|----------------------------------------------------|----------------------------------------------------------|----------------------------------------------------------------|--------------------------------------------------------------------|--------------------------------------------------------------|
| <b>SBA-15</b>   | 3464                                                       | 1633                                                  | 996                                                  | 798                                                | 1056                                                     | -                                                              | -                                                                  | -                                                            |
| <b>N-SBA-15</b> | 3428                                                       | 1637                                                  | 970                                                  | 794                                                | 1042                                                     | 2932                                                           | 730                                                                | 1550                                                         |

str.: stretching; bend.: bending; sym: symmetric; asym.: asymmetric. deform.: deformation.

**Table S2.** FTIR data of the catalyst's precursors [Ni]<sub>i</sub>@N-SBA-15, SBA-15 and N-SBA-15

| Samples                     |                                   | $\nu$ SiO-H str. ( $\blacktriangle$ ) ( $\text{cm}^{-1}$ ) | $\nu$ SiO-H deform.. ( $\Delta$ ) ( $\text{cm}^{-1}$ ) | $\nu$ SiO-H bend. ( $\square$ ) ( $\text{cm}^{-1}$ ) | $\nu$ Si-O sym. ( $\bullet$ ) ( $\text{cm}^{-1}$ ) | $\nu$ Si-O asym. ( $\blacksquare$ ) ( $\text{cm}^{-1}$ ) | $\nu$ CH <sub>2</sub> (APTES) ( $\circ$ ) ( $\text{cm}^{-1}$ ) | $\nu$ N-H out-plane bend. ( $\blacklozenge$ ) ( $\text{cm}^{-1}$ ) | $\nu$ N-H in-plane bend. ( $\diamond$ ) ( $\text{cm}^{-1}$ ) |
|-----------------------------|-----------------------------------|------------------------------------------------------------|--------------------------------------------------------|------------------------------------------------------|----------------------------------------------------|----------------------------------------------------------|----------------------------------------------------------------|--------------------------------------------------------------------|--------------------------------------------------------------|
| <b>SBA-15</b>               |                                   | 3464                                                       | 1633                                                   | 996                                                  | 798                                                | 1056                                                     | -                                                              | -                                                                  | -                                                            |
| <b>N-SBA-15</b>             |                                   | 3428                                                       | 1637                                                   | 970                                                  | 794                                                | 1042                                                     | 2932                                                           | 730                                                                | 1550                                                         |
| <b>Catalysts Precursors</b> | <b>[Ni]<sub>Ac</sub>@N-SBA-15</b> | 3442                                                       | 1626                                                   | 975                                                  | 798                                                | 1046                                                     | 2934                                                           | 734                                                                | 1539                                                         |
|                             | <b>[Ni]<sub>Nt</sub>@N-SBA-15</b> | 3442                                                       | 1630                                                   | 975                                                  | 798                                                | 1049                                                     | 2932                                                           | 727                                                                | 1535                                                         |
|                             | <b>[Ni]<sub>Cl</sub>@N-SBA-15</b> | 3435                                                       | 1626                                                   | 978                                                  | 795                                                | 1053                                                     | 2929                                                           | 734                                                                | 1511                                                         |
|                             | <b>[Ni]<sub>Sl</sub>@N-SBA-15</b> | 3417                                                       | 1630                                                   | 978                                                  | 791                                                | 1053                                                     | 2939                                                           | 734                                                                | 1527                                                         |

str.: stretching; bend.: bending; sym: symmetric; asym.: asymmetric; deform.: deformation.

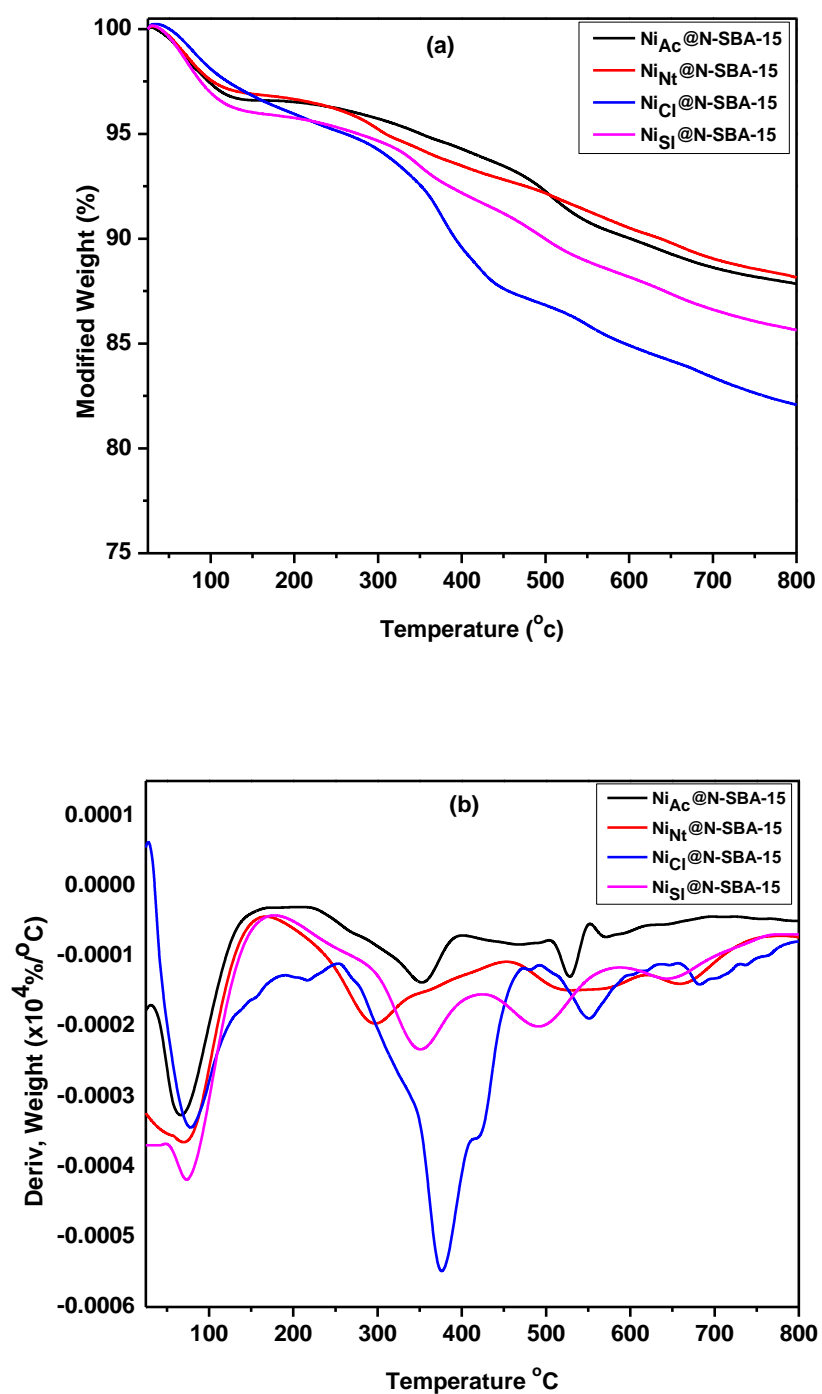

**Figure S3.** TGA (a) and DTA (b) analysis of precursors  $[\text{Ni}]_i@N\text{-SBA-15}$   
( $i = \text{Ac, Nt, Cl and Sl}$ )

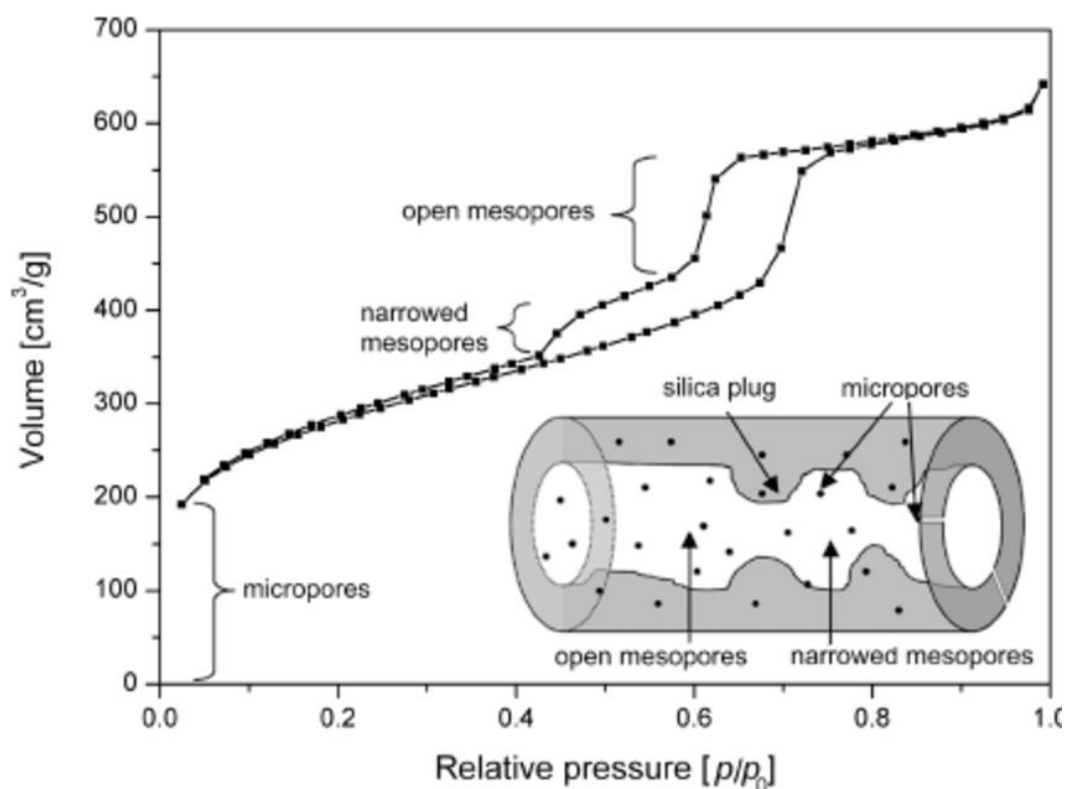

**Figure S4.** Effect of narrowed pores in the SBA-15 structure on the isotherm shape. [53]

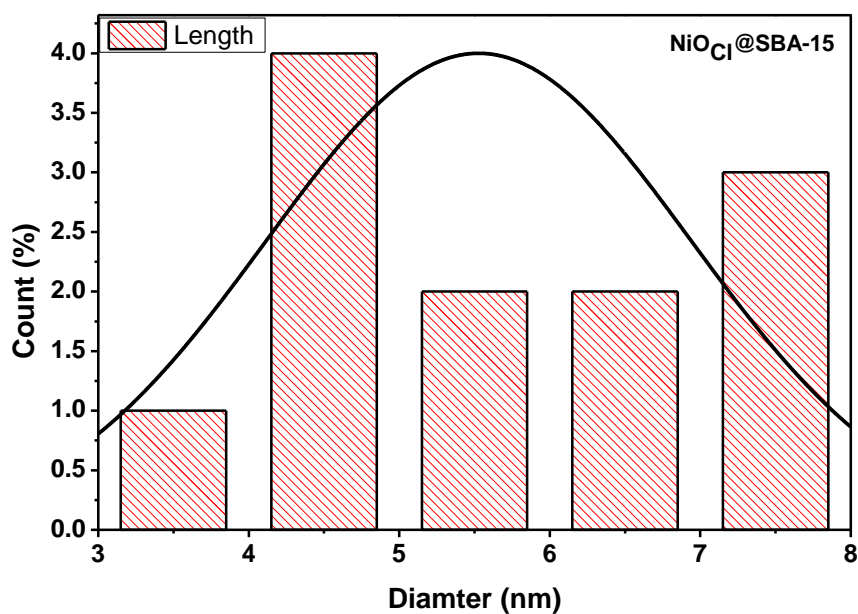

**Figure S5.** Particles diameter distribution in NiOCl@SBA-15

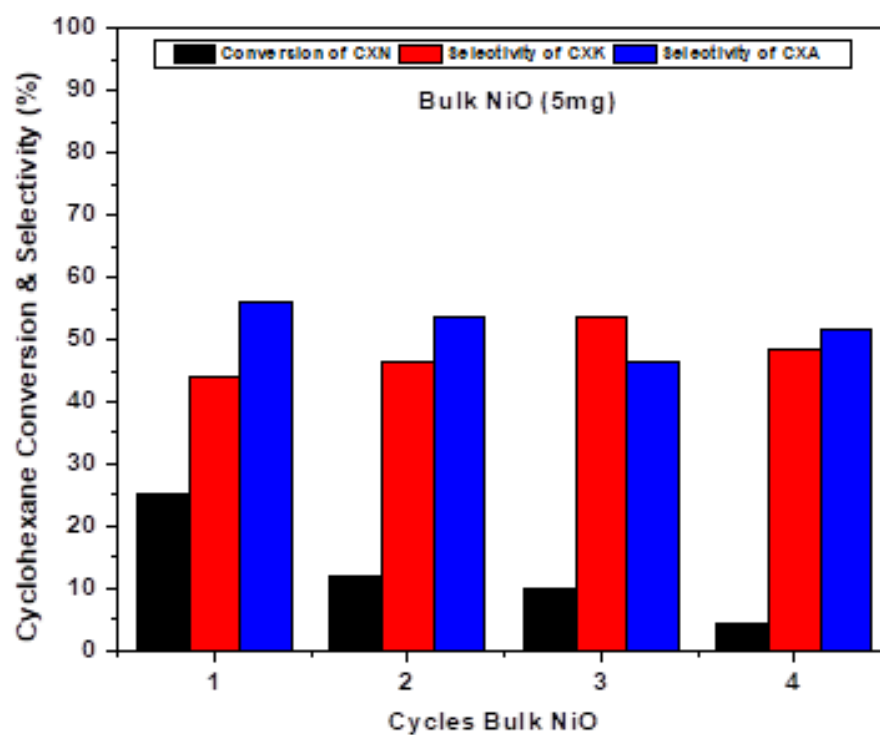

**Figure S6.** Reusability of bulk NiO powder as a catalyst in the oxidation of CXN with *m*-CPBA.
